# Supplementary material
Source: Springer Nature journal article supplement (https://www.springermedizin.de/resource/supplementary/12881_2010_797_MOESM1_ESM.pdf/9451434)

22

-4 -2 -1 0 +1 +2 +4

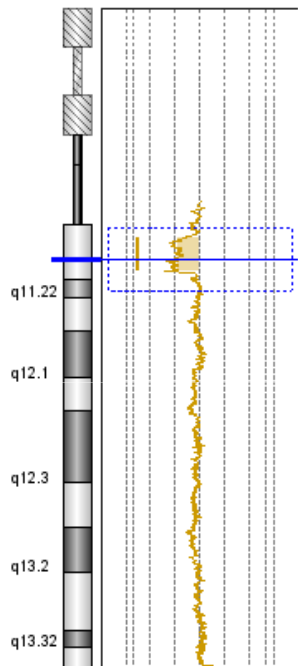

22: 16015273-21259092, 5.24 Mb

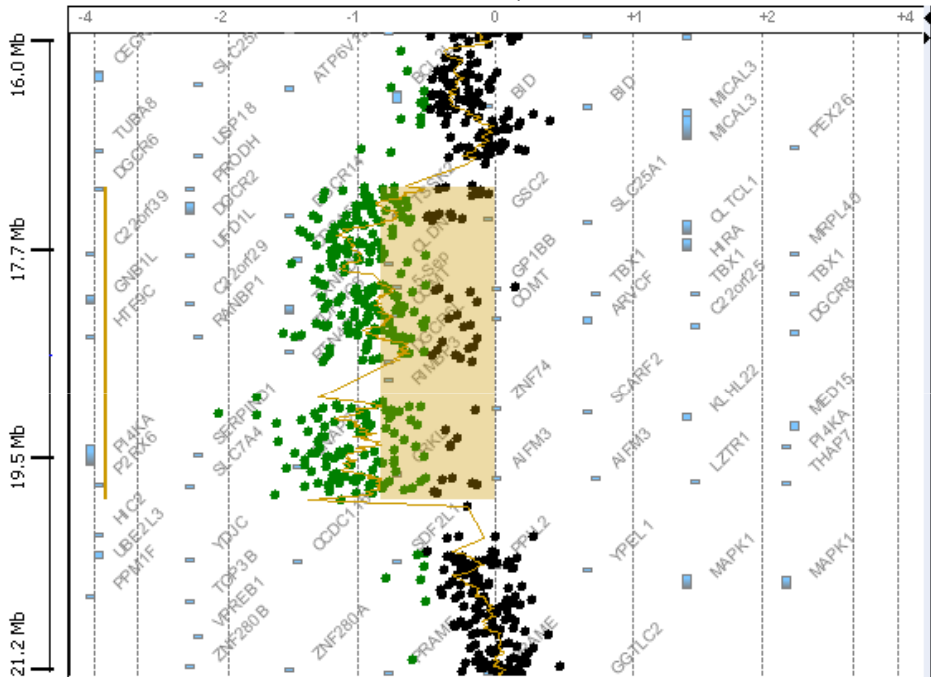

Supplement: MOESM1 [file 9451434]
